# Supplementary material
Source: publisher figshare collection journal article supplement (https://brill.figshare.com/articles/dataset/_/28358405)
Supplement: Supplementary file 1 [file 1]

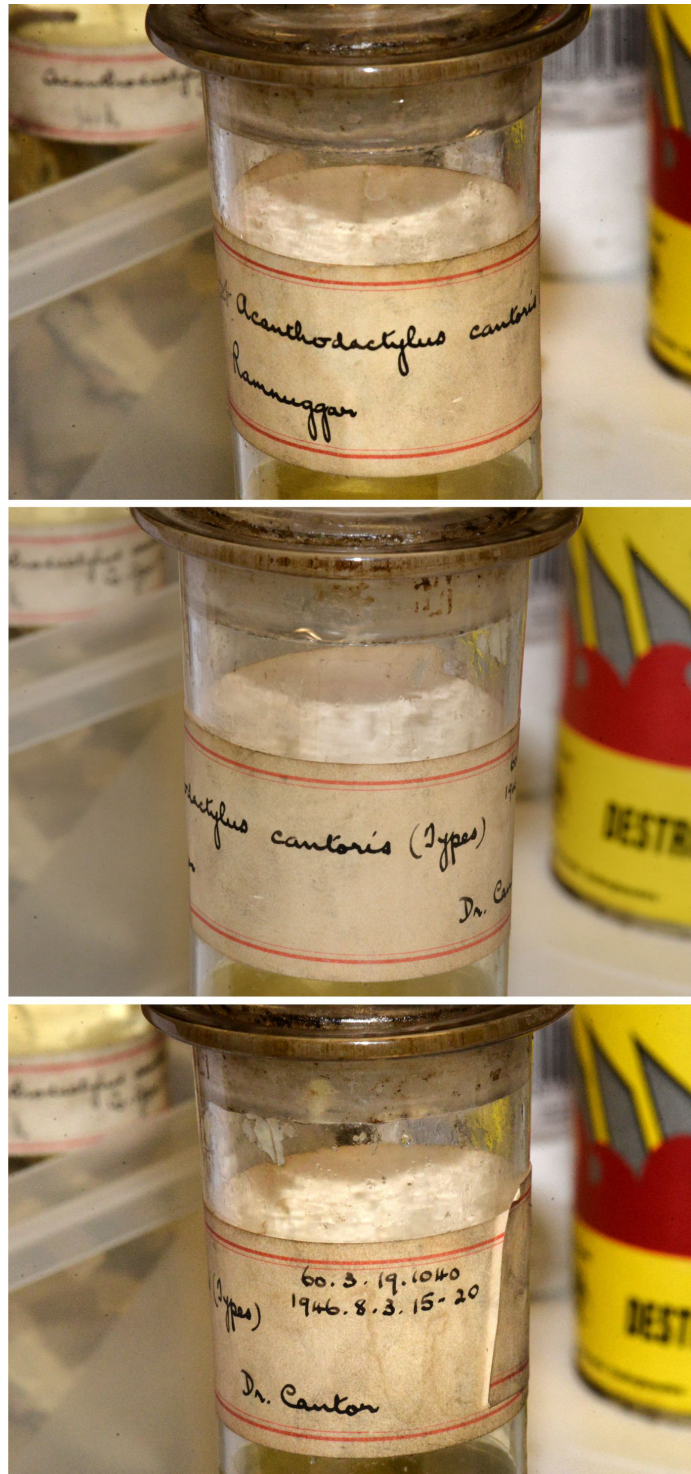

**Figure S2.** Jar containing the type specimens of *Acanthodactylus cantoris* from “Ramnuggar” in the collection of the Natural History Museum, London. The old catalogue number [18]60.3.19.1040 reflects that the series was inventoried March 19, 1860. Photo: Patrick Campbell.
