# Supplementary material
Source: publisher figshare collection journal article supplement (https://brill.figshare.com/articles/dataset/_/28358405)
Supplement: Supplementary file 1 [file 1]

## Sheet: Table S1
Table S1. Primers used for amplification and sequencing and PCR conditions.
Primer name	Gene	Direction (5' to 3')	Sequence	Reference
LE2190	16S	For	GTAGGCCTCAAAGCAGCCAC	Pavlicev and Mayer (2009)
H03056	16S	Rev	CCGGTCTGAACTCAGATCACG	Pavlicev and Mayer (2009)
VF1-d	COI	For	TTCTCAACCAACCACAARGAYATYGG	Ivanova et al. (2007)
VR1-d	COI	Rev	TAGACTTCTGGGTGGCCRAARAAYCA	Ivanova et al. (2007)
LgluLK*	cyt b part a / * complete	For	AACCGCTGTTGTCTTCAACTA	Pavlicev and Mayer (2009)
Lacertidae_cytb	cyt b part a	Rev	AAARTTTTCTGGGTCSCCKA	Khan et al. (2021)
Lpod	cyt b part b	For	CAGACAAAATTCCATTCCACC	Pavlicev and Mayer (2009)
Lpod_mod	cyt b part b	For	CVGACAAAATTCCATTYCAYC	Khan et al. (2021)
NTheH*	cyt b part b / * complete	Rev	GGTTTACAAGACCAGTGCTTT	Pavlicev and Mayer (2009)
RAG-fo*	Rag1 part a / * complete	For	GAAAAGGGCTACATCCTGG	Mayer and Pavlicev (2007)
RGS-587H	Rag1 part a	Rev	AGCCAAACTGTTGAGGATAC	Mayer and Pavlicev (2007)
RGS-380L	Rag1 part b	For	CTCAGTACCAAGATCCTTGC	Mayer and Pavlicev (2007)
RAG-re*	Rag1 part b / * complete	Rev	CCAGTTATTGCTTTTACAGTT	Pavlicev and Mayer (2009)
PCR conditions: Initial denaturation at 94°C for 2 min, 35 cycles with denaturation at 95°C for 30 s, annealing for 30 s at specific temperature, and extension at 72°C for 50 s, followed by a final extension step at 72°C for 7 min.
Annealing temperatures for 16S: 59°C, COI: 54°C, cyt b complete and fragments a and b: 53°C, Rag1 complete and fragments a and b: 50°C.
References:
Khan, M.A., Jablonski, D., Nadeem, M.S., Masroor, R., Kehlmaier, C., Spitzweg, C., Fritz, U. (2021): Molecular phylogeny of Eremias spp. from Pakistan contributes to a better understanding of the diversity of racerunners. J. Zool. Syst. Evol. Res. 59: 466–483.
Ivanova, N.V., Zemlak, T.S., Hanner, R.H., Hebert, P.D.N. (2007): Universal primer cocktails for fish DNA barcoding. Mol. Ecol. Notes 7: 544–548.
Mayer, W., Pavlicev, M. (2007): The phylogeny of the family Lacertidae (Reptilia) based on nuclear DNA sequences: Convergent adaptations to arid habitats within the subfamily Eremiainae. Mol. Phylogenet. Evol. 44: 1155–1163.
Pavlicev, M., Mayer, W. (2009): Fast radiation of the subfamily Lacertinae (Reptilia: Lacertidae): History or methodical artefact? Mol. Phylogenet. Evol. 52: 727–734.

## Sheet: Table S2
Table S2. Sequences of the genus Acanthodactylus used for the cytochrome b tree.
MTD code	PMNH or DJ-CUHC code	Species	GenBank accession numbers	Locality	N	E	Reference
—	—	Acanthodactylus aegyptius	KX297110	Isreal: Shivta junction	30.9434	34.5952	Tamar et al. (2016)
—	—	Acanthodactylus arabicus	KX297033	Yemen: Bir Ali	14.0245	48.3463	Tamar et al. (2016)
—	—	Acanthodactylus arabicus	KX297031	Yemen: Lahij: Bir Nasr Farm: 3 km SW (by air) of Sabir	13.0579	44.884	Tamar et al. (2016)
—	—	Acanthodactylus aureus	KX297117	Mauritania: Between Nouadhibou and Bou Lanouar	20.9324	-17.0325	Tamar et al. (2016)
—	—	Acanthodactylus bedriagai	KX297153	Tunisia: Roman Ruins Bou Chebka-Haidra	35.2404	9.11969	Tamar et al. (2016)
—	—	Acanthodactylus beershebensis	KX297165	Israel: Nahal Tzavoa	31.4724	34.4973	Tamar et al. (2016)
—	—	Acanthodactylus blanci	KX297134	Tunisia: Jebel Tamesmida	36.7738	10.2057	Tamar et al. (2016)
—	—	Acanthodactylus blanfordii	KJ652723	Iran: Bampoor	27.1971	60.4693	Heidari et al. (2014)
—	—	Acanthodactylus blanfordii	KJ652714	Iran: Chabahar-Beriis	25.3079	60.6475	Heidari et al. (2014)
—	—	Acanthodactylus blanfordii	KJ652725	Iran: Chabahar-Beriis	25.3079	60.6475	Heidari et al. (2014)
—	—	Acanthodactylus blanfordii	KJ652721	Iran: Chabahar-Govater	25.1351	61.4838	Heidari et al. (2014)
—	—	Acanthodactylus blanfordii	KJ652722	Iran: Chabahar-Govater	25.1351	61.4838	Heidari et al. (2014)
—	—	Acanthodactylus blanfordii	KJ652724	Iran: Chabahar-Lipar	25.2548	60.8324	Heidari et al. (2014)
—	—	Acanthodactylus blanfordii	KJ652726	Iran: Chabahar-Lipar	25.2548	60.8324	Heidari et al. (2014)
—	—	Acanthodactylus blanfordii	KJ652715	Iran: Chabahar-Tiskoopan	25.2519	60.8203	Heidari et al. (2014)
—	—	Acanthodactylus blanfordii	KJ652720	Iran: Chabahar-Tiskoopan	25.2519	60.8203	Heidari et al. (2014)
—	—	Acanthodactylus blanfordii	KJ652710	Iran: Hormozgan-Minab	27.026	57.314	Heidari et al. (2014)
—	—	Acanthodactylus blanfordii	KJ652711	Iran: Hormozgan-Minab	27.026	57.314	Heidari et al. (2014)
—	—	Acanthodactylus blanfordii	KJ652712	Iran: Hormozgan-Minab	27.026	57.314	Heidari et al. (2014)
—	—	Acanthodactylus blanfordii	KJ652713	Iran: Hormozgan-Minab	27.026	57.314	Heidari et al. (2014)
—	—	Acanthodactylus blanfordii	KJ652716	Iran: Hormozgan-Minab	27.026	57.314	Heidari et al. (2014)
—	—	Acanthodactylus blanfordii	KJ652717	Iran: Hormozgan-Minab	27.026	57.314	Heidari et al. (2014)
—	—	Acanthodactylus blanfordii	KJ652718	Iran: Hormozgan-Minab	27.026	57.314	Heidari et al. (2014)
—	—	Acanthodactylus blanfordii	KJ652719	Iran: Hormozgan-Minab	27.026	57.314	Heidari et al. (2014)
—	—	Acanthodactylus blanfordii	KJ567846	Iran: Sand dunes 7 km N of Bampur	27.197	60.4586	Tamar et al. (2014)
—	—	Acanthodactylus blanfordii	KJ567847	Iran: Sand dunes 7 km N of Bampur	27.1958	60.4572	Tamar et al. (2014)
—	—	Acanthodactylus blanfordii	KX297017	Oman: 2 km SW of Suadi Al Batha	23.7695	57.7663	Tamar et al. (2016)
—	—	Acanthodactylus blanfordii	KX297018	Oman: Al Azaiba	23.5859	58.3665	Tamar et al. (2016)
19314	3777	Acanthodactylus blanfordii	PQ867988	Pakistan: Balochistan: Nok kundi: Geeo	29.1899	62.9827	This study
19317	3786	Acanthodactylus blanfordii	PQ867994	Pakistan: Balochistan: Nok kundi: Koh-e-sultan	29.1194	62.8333	This study
19315	3781	Acanthodactylus blanfordii	PQ867991	Pakistan: Balochistan: Nok kundi: Mizal Darband	29.207	62.7401	This study
19316	3783	Acanthodactylus blanfordii	PQ867992	Pakistan: Balochistan: Nok kundi: Mizal Darband	29.2105	62.7907	This study
19431	3778	Acanthodactylus blanfordii	PQ867989	Pakistan: Balochistan: Nok kundi: Mizal Darband	29.2539	62.8219	This study
19432	3779	Acanthodactylus blanfordii	PQ867990	Pakistan: Balochistan: Nok kundi: Mizal Darband	29.2239	62.8635	This study
19433	3785	Acanthodactylus blanfordii	PQ867993	Pakistan: Balochistan: Nok kundi: Mizal Darband	29.2238	62.863	This study
19324	3730	Acanthodactylus blanfordii	PQ867950	Pakistan: Balochistan: Nushki: Hazar Juft	29.6076	65.8461	This study
19325	3731	Acanthodactylus blanfordii	PQ867951	Pakistan: Balochistan: Nushki: Hazar Juft	29.6076	65.8462	This study
19437	3732	Acanthodactylus blanfordii	PQ867952	Pakistan: Balochistan: Nushki: Hazar Juft	29.6075	65.8463	This study
19320	3722	Acanthodactylus blanfordii	PQ867945	Pakistan: Balochistan: Nushki: Khar	29.6552	65.7697	This study
19321	3738	Acanthodactylus blanfordii	PQ867953	Pakistan: Balochistan: Nushki: Khar	29.6561	65.7682	This study
19434	3725	Acanthodactylus blanfordii	PQ867946	Pakistan: Balochistan: Nushki: Khar	29.6576	65.7669	This study
19322	3727	Acanthodactylus blanfordii	PQ867948	Pakistan: Balochistan: Nushki: Zangi Nawar	29.4095	65.773	This study
19323	3726	Acanthodactylus blanfordii	PQ867947	Pakistan: Balochistan: Nushki: Zangi Nawar	29.4089	65.7862	This study
19436	3729	Acanthodactylus blanfordii	PQ867949	Pakistan: Balochistan: Nushki: Zangi Nawar	29.4414	65.7309	This study
—	—	Acanthodactylus blanfordii	KX297016	UAE: Kalba mangroves	25.0278	56.3609	Tamar et al. (2016)
—	—	Acanthodactylus boskianus	KX528832	Egypt: Ata' mountain	28.5392	33.9749	Psonis et al. (2016)
—	—	Acanthodactylus boskianus	KJ567790	Egypt: Sinai: Baluza	29.5001	34.0005	Tamar et al. (2014)
—	—	Acanthodactylus boskianus	KX528840	Egypt: Wadi Feiran: Feiran oasis to Ras Sharatib	28.7186	33.6184	Psonis et al. (2016)
—	—	Acanthodactylus boskianus	KJ652767	Iran: Darre Shahr: Ilam	33.143	47.3823	Heidari et al. (2014)
—	—	Acanthodactylus boskianus	KJ567826	Jordan: Wadi Ramm	29.5742	35.4211	Tamar et al. (2014)
—	—	Acanthodactylus boskianus	KX528878	Libya: Sirte to Misirata	31.7967	15.2362	Psonis et al. (2016)
—	—	Acanthodactylus boskianus	KJ567819	Morocco: Between Ait-Khoujman and Kerrandou	32.244	-4.39541	Tamar et al. (2014)
—	—	Acanthodactylus boskianus	KX296990	Niger: Karosofoua	17.5969	8.0829	Tamar et al. (2016)
—	—	Acanthodactylus boskianus	KJ567802	Oman: 16 km S of Duqm	19.6386	57.6745	Tamar et al. (2014)
—	—	Acanthodactylus boskianus	KJ567804	Oman: Wadi Salit	19.0046	57.8058	Tamar et al. (2014)
—	—	Acanthodactylus busacki	KX297172	Morocco: Park Massa, near Sidi Binzarne	30.0555	-9.65166	Tamar et al. (2016)
—	—	Acanthodactylus cantoris	KJ567850	Pakistan: Balochistan: 10 km S of Uthal	25.8254	66.6218	Tamar et al. (2014)
21072	DJ-CUHC 9490	Acanthodactylus cantoris	PQ868004	Pakistan: Khyber Pakhtunkhwa: Bannu: Ghoriwala, Kurram River	32.9252	70.7564	This study
21073	DJ-CUHC 9491	Acanthodactylus cantoris	PQ868005	Pakistan: Khyber Pakhtunkhwa: Bannu: Ghoriwala, Kurram River	32.9255	70.7569	This study
21074	DJ-CUHC 9492	Acanthodactylus cantoris	PQ868006	Pakistan: Khyber Pakhtunkhwa: Bannu: Ghoriwala, Kurram River	32.9252	70.7575	This study
21075	DJ-CUHC 9493	Acanthodactylus cantoris	PQ868007	Pakistan: Khyber Pakhtunkhwa: Bannu: Ghoriwala, Kurram River	32.9245	70.7575	This study
21076	DJ-CUHC 9494	Acanthodactylus cantoris	PQ868008	Pakistan: Khyber Pakhtunkhwa: Bannu: Ghoriwala, Kurram River	32.926	70.7551	This study
19326	3802	Acanthodactylus cantoris	PQ868000	Pakistan: Khyber Pakhtunkhwa: Dera Ismail Khan: Pahar pur	32.07	70.9757	This study
19327	3803	Acanthodactylus cantoris	PQ868001	Pakistan: Khyber Pakhtunkhwa: Dera Ismail Khan: Pahar pur	32.0696	70.9757	This study
21078	DJ-CUHC 9506	Acanthodactylus cantoris	PQ868009	Pakistan: Khyber Pakhtunkhwa: Dera Ismail Khan: Pahar pur: Wanda Karim Khan	32.0702	70.9753	This study
21079	DJ-CUHC 9507	Acanthodactylus cantoris	PQ868010	Pakistan: Khyber Pakhtunkhwa: Dera Ismail Khan: Pahar pur: Wanda Karim Khan	32.0699	70.9756	This study
19312	3805	Acanthodactylus cantoris	PQ868003	Pakistan: Punjab: Bakkar: Kallur Kot: Dawood abad	32.1556	71.2716	This study
19313	3804	Acanthodactylus cantoris	PQ868002	Pakistan: Punjab: Bakkar: Kallur Kot: Dawood abad	32.1556	71.2717	This study
19309	3760	Acanthodactylus cantoris	PQ867973	Pakistan: Punjab: Cholistan: Dinghar Wildlife Check post	28.6994	71.5147	This study
19413	3756	Acanthodactylus cantoris	PQ867970	Pakistan: Punjab: Cholistan: Dinghar Wildlife Check post	28.7637	71.8448	This study
19414	3757	Acanthodactylus cantoris	PQ867971	Pakistan: Punjab: Cholistan: Dinghar Wildlife Check post	28.7815	71.6827	This study
19415	3758	Acanthodactylus cantoris	PQ867972	Pakistan: Punjab: Cholistan: Dinghar Wildlife Check post	28.7346	71.5415	This study
19416	3761	Acanthodactylus cantoris	PQ867974	Pakistan: Punjab: Cholistan: Dinghar Wildlife Check post	28.7074	71.4973	This study
19417	3762	Acanthodactylus cantoris	PQ867975	Pakistan: Punjab: Cholistan: Dinghar Wildlife Check post	28.7309	71.487	This study
19418	3763	Acanthodactylus cantoris	PQ867976	Pakistan: Punjab: Cholistan: Dinghar Wildlife Check post	28.7354	71.5259	This study
19419	3764	Acanthodactylus cantoris	PQ867977	Pakistan: Punjab: Cholistan: Dinghar Wildlife Check post	28.7066	71.5198	This study
19420	3765	Acanthodactylus cantoris	PQ867978	Pakistan: Punjab: Cholistan: Dinghar Wildlife Check post	28.7134	71.5008	This study
19421	3766	Acanthodactylus cantoris	PQ867979	Pakistan: Punjab: Cholistan: Dinghar Wildlife Check post	28.6956	71.5257	This study
19422	3767	Acanthodactylus cantoris	PQ867980	Pakistan: Punjab: Cholistan: Dinghar Wildlife Check post	28.699	71.5435	This study
19423	3768	Acanthodactylus cantoris	PQ867981	Pakistan: Punjab: Cholistan: Dinghar Wildlife Check post	28.7968	71.5292	This study
19424	3769	Acanthodactylus cantoris	PQ867982	Pakistan: Punjab: Cholistan: Dinghar Wildlife Check post	28.7407	71.4868	This study
19425	3770	Acanthodactylus cantoris	PQ867983	Pakistan: Punjab: Cholistan: Dinghar Wildlife Check post	28.7675	71.6594	This study
19426	3771	Acanthodactylus cantoris	PQ867984	Pakistan: Punjab: Cholistan: Dinghar Wildlife Check post	28.7501	71.5729	This study
19427	3772	Acanthodactylus cantoris	PQ867985	Pakistan: Punjab: Cholistan: Dinghar Wildlife Check post	28.7384	71.5136	This study
19430	3799	Acanthodactylus cantoris	PQ867999	Pakistan: Punjab: Bahawalpur: CIDS: BJC	29.3263	71.6441	This study
19311	3788	Acanthodactylus cantoris	PQ867995	Pakistan: Punjab: Yazman: Channan pir: Gharkan	28.9767	71.6653	This study
—	—	Acanthodactylus cantoris	KJ567851	Pakistan: Sindh: 45 km NW of Nagar Parkar	24.3618	70.7514	Tamar et al. (2014)
19304	3745	Acanthodactylus cantoris	PQ867959	Pakistan: Sindh: Mithi Bypass: Kheen knyoon Road	24.3697	70.8127	This study
19305	3774	Acanthodactylus cantoris	PQ867986	Pakistan: Sindh: Nagar Parkar: Kasbo Road near Cricket Play Ground	24.3527	70.7649	This study
19306	3746	Acanthodactylus cantoris	PQ867960	Pakistan: Sindh: Nagar Parkar: Kasbo Road near Cricket Play Ground	24.3528	70.7651	This study
19307	3775	Acanthodactylus cantoris	PQ867987	Pakistan: Sindh: Nagar Parkar: Kasbo Road near Cricket Play Ground	24.3536	70.7659	This study
19308	3739	Acanthodactylus cantoris	PQ867954	Pakistan: Sindh: Mithi Bypass: Kheen knyoon Road	24.3686	70.8129	This study
19310	3798	Acanthodactylus cantoris	PQ867998	Pakistan: Punjab: Bahawalpur: CIDS: BJC	29.3263	71.6441	This study
19318	3795	Acanthodactylus cantoris	PQ867996	Pakistan: Sindh: Mithi Bypass: Kheen knyoon Road	24.3682	70.8136	This study
19398	3741	Acanthodactylus cantoris	PQ867955	Pakistan: Sindh: Mithi Bypass: Kheen knyoon Road	24.3673	70.8122	This study
19399	3742	Acanthodactylus cantoris	PQ867956	Pakistan: Sindh: Mithi Bypass: Kheen knyoon Road	24.3748	70.806	This study
19401	3744	Acanthodactylus cantoris	PQ867958	Pakistan: Sindh: Mithi Bypass: Kheen knyoon Road	24.375	70.805	This study
19402	3747	Acanthodactylus cantoris	PQ867961	Pakistan: Sindh: Mithi Bypass: Kheen knyoon Road	24.375	70.805	This study
19403	3748	Acanthodactylus cantoris	PQ867962	Pakistan: Sindh: Mithi Bypass: Kheen knyoon Road	24.3748	70.806	This study
19404	3749	Acanthodactylus cantoris	PQ867963	Pakistan: Sindh: Mithi Bypass: Kheen knyoon Road	24.3686	70.8133	This study
19405	3750	Acanthodactylus cantoris	PQ867964	Pakistan: Sindh: Mithi Bypass: Kheen knyoon Road	24.3649	70.8106	This study
19406	3751	Acanthodactylus cantoris	PQ867965	Pakistan: Sindh: Mithi Bypass: Kheen knyoon Road	24.3673	70.8133	This study
19407	3752	Acanthodactylus cantoris	PQ867966	Pakistan: Sindh: Mithi Bypass: Kheen knyoon Road	24.3649	70.8125	This study
19408	3753	Acanthodactylus cantoris	PQ867967	Pakistan: Sindh: Mithi Bypass: Kheen knyoon Road	24.3649	70.8125	This study
19409	3754	Acanthodactylus cantoris	PQ867968	Pakistan: Sindh: Mithi Bypass: Kheen knyoon Road	24.3666	70.8135	This study
19319	3796	Acanthodactylus cantoris	PQ867997	Pakistan: Sindh: Mithi Bypass: Kheen knyoon Road	24.3667	70.8134	This study
19400	3743	Acanthodactylus cantoris	PQ867957	Pakistan: Sindh: Mithi Bypass: Kheen knyoon Road	24.3666	70.8135	This study
19410	3755	Acanthodactylus cantoris	PQ867969	Pakistan: Sindh: Mithi Bypass: Kheen knyoon Road	24.3748	70.806	This study
—	—	Acanthodactylus erythrurus	KX297135	Morocco: Azrou	33.435	-5.23341	Tamar et al. (2016)
—	—	Acanthodactylus erythrurus	KX297136	Morocco: Sidi Ifni	29.3513	-10.1868	Tamar et al. (2016)
—	—	Acanthodactylus erythrurus	KX297127	Spain: Barbate	36.1907	-5.91982	Tamar et al. (2016)
—	—	Acanthodactylus felicis	KX297010	Oman: Mirbat	16.9876	54.7028	Tamar et al. (2016)
—	—	Acanthodactylus gongrorhynchatus	KX297125	UAE: Al Ain	24.151	55.7702	Tamar et al. (2016)
—	—	Acanthodactylus grandis	KJ652751	Iran: Bushehr: Alichangii	28.9218	50.8197	Heidari et al. (2014)
—	—	Acanthodactylus grandis	KJ652752	Iran: Bushehr: Alichangii	28.9218	50.8197	Heidari et al. (2014)
—	—	Acanthodactylus grandis	KX297024	Syria: 5 km S of Palmyra	34.5687	38.2922	Tamar et al. (2016)
—	—	Acanthodactylus grandis	JX847554	Syria: 60 km W of Dayr az Zawr	35.3308	40.1375	Poulakakis et al. (2013)
—	—	Acanthodactylus grandis	KX297022	Syria: Sadad	34.3205	36.9276	Tamar et al. (2016)
—	—	Acanthodactylus guineensis	KX297178	Niger: Near Kollo	14.2208	-4.50644	Tamar et al. (2016)
—	—	Acanthodactylus haasi	KX297030	Oman: 88 km NW of Haime	32.4533	121.304	Tamar et al. (2016)
—	—	Acanthodactylus hardyi	KX297029	Kuwait: 35 km SW of Ratqa	29.0716	48.0869	Tamar et al. (2016)
—	—	Acanthodactylus harranensis	KX297023	Türkiye: Harran	36.8626	39.024	Tamar et al. (2016)
—	—	Acanthodactylus khamirensis	KJ652702	Iran: 7 km E of Khamir Port	26.9519	55.5708	Heidari et al. (2014)
—	—	Acanthodactylus khamirensis	KJ652703	Iran: 7 km E of Khamir Port	26.9519	55.5708	Heidari et al. (2014)
—	—	Acanthodactylus khamirensis	KJ652704	Iran: 7 km E of Khamir Port	26.9519	55.5708	Heidari et al. (2014)
—	—	Acanthodactylus khamirensis	KJ652705	Iran: 7 km E of Khamir Port	26.9519	55.5708	Heidari et al. (2014)
—	—	Acanthodactylus khamirensis	KJ652706	Iran: 7 km E of Khamir Port	26.9519	55.5708	Heidari et al. (2014)
—	—	Acanthodactylus khamirensis	KJ652708	Iran: 7 km E of Khamir Port	26.9519	55.5708	Heidari et al. (2014)
—	—	Acanthodactylus khamirensis	KJ652707	Iran: Parsian: Hormozgan	27.2188	53.0413	Heidari et al. (2014)
—	—	Acanthodactylus khamirensis	KJ652709	Iran: Parsian: Hormozgan	27.2188	53.0413	Heidari et al. (2014)
—	—	Acanthodactylus lineomaculatus	KX297130	Morocco: Tangier	35.7545	-5.83413	Tamar et al. (2016)
—	—	Acanthodactylus longipes	KX297104	Algeria: Tinduf	27.1449	-7.33632	Tamar et al. (2016)
—	—	Acanthodactylus maculatus	KX297149	Morocco: 6 km N of Erfoud	31.4631	-4.23347	Tamar et al. (2016)
—	—	Acanthodactylus maculatus	KX297150	Morocco: North shore of Dayet Srji (near Merzouga)	31.105	-4.05885	Tamar et al. (2016)
—	—	Acanthodactylus margaritae	KY807730	Morocco: 1 km E of Atlantic Ocean, W of Tamellalt	29.8061	–9,6475	Tamar et al. (2017)
—	—	Acanthodactylus masirae	KJ567849	Oman: 20 km E of Ras Madrakah	18.9794	57.7883	Tamar et al. (2014)
—	—	Acanthodactylus micropholis	KJ652739	Iran: Chabahar: Tiskoopan	25.2958	60.646	Heidari et al. (2014)
—	—	Acanthodactylus micropholis	KJ652740	Iran: Chabahar: Tiskoopan	25.2958	60.646	Heidari et al. (2014)
—	—	Acanthodactylus micropholis	KJ652741	Iran: Chabahar: Tiskoopan	25.2958	60.646	Heidari et al. (2014)
—	—	Acanthodactylus micropholis	KJ652742	Iran: Chabahar: Tiskoopan	25.2958	60.646	Heidari et al. (2014)
—	—	Acanthodactylus micropholis	KJ652743	Iran: Chabahar: Tiskoopan	25.2958	60.646	Heidari et al. (2014)
—	—	Acanthodactylus micropholis	KJ652744	Iran: Chabahar: Tiskoopan	25.2958	60.646	Heidari et al. (2014)
—	—	Acanthodactylus micropholis	KX297026	Iran: Gahkom: Hormozgan	28.1732	55.8272	Tamar et al. (2016)
—	—	Acanthodactylus micropholis	KJ652737	Iran: Zahedan: Mianbazar	29.4506	60.8871	Heidari et al. (2014)
—	—	Acanthodactylus micropholis	KJ652738	Iran: Zahedan: Mianbazar	29.4506	60.8871	Heidari et al. (2014)
—	—	Acanthodactylus micropholis	KJ652745	Iran: Zahedan: Mianbazar	29.4506	60.8871	Heidari et al. (2014)
—	—	Acanthodactylus micropholis	KJ652746	Iran: Zahedan: Mianbazar	29.4506	60.8871	Heidari et al. (2014)
—	—	Acanthodactylus micropholis	KJ652747	Iran: Zahedan: Mianbazar	29.4506	60.8871	Heidari et al. (2014)
—	—	Acanthodactylus micropholis	KX297025	Pakistan: Baluchistan: Las Bela District: 8.5 km W of Bela	26.2186	66.314	Tamar et al. (2016)
—	—	Acanthodactylus nilsoni	KJ652734	Iran: Qasr-e-Shirin	34.5147	45.5775	Heidari et al. (2014)
—	—	Acanthodactylus opheodurus	KX296997	Oman: 5 km NW of Tawa	22.3945	59.2409	Tamar et al. (2016)
—	—	Acanthodactylus orientalis	KX297184	Syria: 28 km N of Palmyra	34.5717	38.3096	Tamar et al. (2016)
—	—	Acanthodactylus pardalis	KX297139	Egypt: El Nasr	30.0608	31.2644	Tamar et al. (2016)
—	—	Acanthodactylus robustus	KX528898	Syria: Steppe between Palmyra and Hamah	34.6424	37.4303	Psonis et al. (2016)
—	—	Acanthodactylus savignyi	KX297176	Algeria: Sidi Mansour: El Makta	35.79	-0.099704	Tamar et al. (2016)
—	—	Acanthodactylus schmidti	KJ652753	Iran: Albaji: 30 km N Ahwaz	31.5129	48.6319	Heidari et al. (2014)
—	—	Acanthodactylus schmidti	KJ652754	Iran: Albaji: 30 km N Ahwaz	31.5129	48.6319	Heidari et al. (2014)
—	—	Acanthodactylus schmidti	KJ652755	Iran: Albaji: 30 km N Ahwaz	31.5129	48.6319	Heidari et al. (2014)
—	—	Acanthodactylus schmidti	KJ652756	Iran: Southern Ilam	33.63	46.4137	Heidari et al. (2014)
—	—	Acanthodactylus schmidti	KJ652757	Iran: Southern Ilam	33.63	46.4137	Heidari et al. (2014)
—	—	Acanthodactylus schmidti	KX297021	Jordan: Shahbat al Hazim	31.6114	37.1825	Tamar et al. (2016)
—	—	Acanthodactylus schmidti	KX297020	Oman: Al-Areesh Desert Camp	22.496	58.6866	Tamar et al. (2016)
—	—	Acanthodactylus schmidti	KX297019	UAE: Sharjah Airport	25.3284	55.5123	Tamar et al. (2016)
—	—	Acanthodactylus schreiberi	KJ567837	Cyprus: Vrysoulles	35.0741	33.8799	Tamar et al. (2014)
—	—	Acanthodactylus schreiberi	KJ567760	Israel: Nizzanim reserve	31.7181	34.6338	Tamar et al. (2014)
—	—	Acanthodactylus schreiberi	KJ567795	Israel: Rishon Le-Zion sands	31.9725	34.7945	Tamar et al. (2014)
—	—	Acanthodactylus schreiberi	KJ567793	Lebanon: Tyre	33.2701	35.2051	Tamar et al. (2014)
—	—	Acanthodactylus scutellatus	KX297076	Egypt: Cairo-Alexandria desert road	30.4495	30.3176	Tamar et al. (2016)
—	—	Acanthodactylus scutellatus	KX297066	Libya: 50 km N of Dirj	30.1604	10.4559	Tamar et al. (2016)
—	—	Acanthodactylus sp1	KJ652727	Iran: Bampoor to Bazman road	27.5855	60.2107	Heidari et al. (2014)
—	—	Acanthodactylus sp1	KJ652728	Iran: Bampoor to Bazman road	27.5855	60.2107	Heidari et al. (2014)
—	—	Acanthodactylus sp1	KJ652729	Iran: Bampoor to Bazman road	27.5855	60.2107	Heidari et al. (2014)
—	—	Acanthodactylus sp1	KJ652730	Iran: Bampoor to Bazman road	27.5855	60.2107	Heidari et al. (2014)
—	—	Acanthodactylus sp1	KJ652731	Iran: Bampoor to Bazman road	27.5855	60.2107	Heidari et al. (2014)
—	—	Acanthodactylus taghitensis	KX297123	Algeria: 3 km S of El-Aiodh Sidi Cheikh	32.4484	0.830349	Tamar et al. (2016)
—	—	Acanthodactylus tilburyi	KX297013	Jordan: Al Muddawara (Husn el Mudawwara)	29.7207	35.9117	Tamar et al. (2016)
—	—	Acanthodactylus tristrami	KX297179	Jordan: Al Harir (Near Tafilah)	31.9983	35.8866	Tamar et al. (2016)
References:
Heidari, N., Rastegar-Pouyani, E., Rastegar-Pouyani, N., Faizi, H. (2014): Molecular phylogeny and biogeography of the genus Acanthodactylus Fitzinger, 1834 (Reptilia: Lacertidae) in Iran, inferred from mtDNA sequences. Zootaxa 3860: 379–395.
Poulakakis, N., Kapli, P., Kardamaki, A., Skourtanioti, E., Göçmen, B., Ilgaz, C., Kumlutaş, Y., Avci, A., Lymberakis, P. (2013): Comparative phylogeography of six herpetofauna species in Cyprus: Late Miocene to Pleistocene colonization routes. Biol. J. Linn. Soc. 108: 619–635.
Psonis, N., Lymberakis, P., Poursanidis, D., Poulakakis, N. (2016): Contribution to the study of Acanthodactylus (Sauria: Lacertidae) mtDNA diversity focusing on the A. boskianus species group. Mitochondrion 30: 78–94.
Tamar, K., Carranza, S., Sindaco, R., Moravec, J., Meiri, S. (2014): Systematics and phylogeography of Acanthodactylus schreiberi and its relationships with Acanthodactylus boskianus (Reptilia: Squamata: Lacertidae). Zool. J. Linn. Soc. 172: 720–739.
Tamar, K., Carranza, S., Sindaco, R., Moravec, J., Trape, J. F., Meiri, S. (2016): Out of Africa: Phylogeny and biogeography of the widespread genus Acanthodactylus (Reptilia: Lacertidae). Mol. Phylogenet. Evol. 103: 6–18.
Tamar, K., Geniez, P., Brito, J.C., Crochet, P.-A. (2017): Systematic revision of Acanthodactylus busacki (Squamata: Lacertidae) with a description of a new species from Morocco. Zootaxa 4276: 357–386.
