# Supplementary material
Source: publisher figshare collection journal article supplement (https://brill.figshare.com/articles/dataset/_/28358405)
Supplement: Supplementary file 2 [file 1]

# Contrasting genetic diversity in the genus *Acanthodactylus* (Squamata: Lacertidae) at its eastern distribution edge

Daniel Jablonski<sup>1,#,\*</sup>, Muazzam A. Khan<sup>2,#</sup>, Christian Kehlmaier<sup>3</sup>, Rafaqat Masroor<sup>4</sup>, Muhammad Sajid Nadeem<sup>5</sup>, Uwe Fritz<sup>3,\*</sup>

1 – Department of Zoology, Comenius University in Bratislava, Ilkovičova 6, Mlynská dolina, 842 15 Bratislava, Slovakia

2 – Department of Botany, Bacha Khan University, Charsadda, Pakistan

3 – Senckenberg Dresden, Museum of Zoology, A. B. Meyer Building, 01109 Dresden, Germany

4 – Zoological Sciences Division, Pakistan Museum of Natural History, Islamabad, Pakistan

5 – Department of Zoology, PMAS-Arid Agricultural University, Rawalpindi, Pakistan

#These authors contributed equally to this article.

\*Corresponding author; e-mails: [daniel.jablonski@uniba.sk](mailto:daniel.jablonski@uniba.sk), [uwe.fritz@senckenberg.de](mailto:uwe.fritz@senckenberg.de)

## Supplementary material

**Table S1.** Primers used for amplification and sequencing and PCR conditions.

**Table S2.** Sequences of the genus *Acanthodactylus* used for the cytochrome b tree.
